# Supplementary material for: Optimisation: defining and exploring a concept to enhance the impact of public health initiatives
Source: Springer Nature journal article supplement (doi:10.1186/s12961-019-0502-6), 2019-12-01

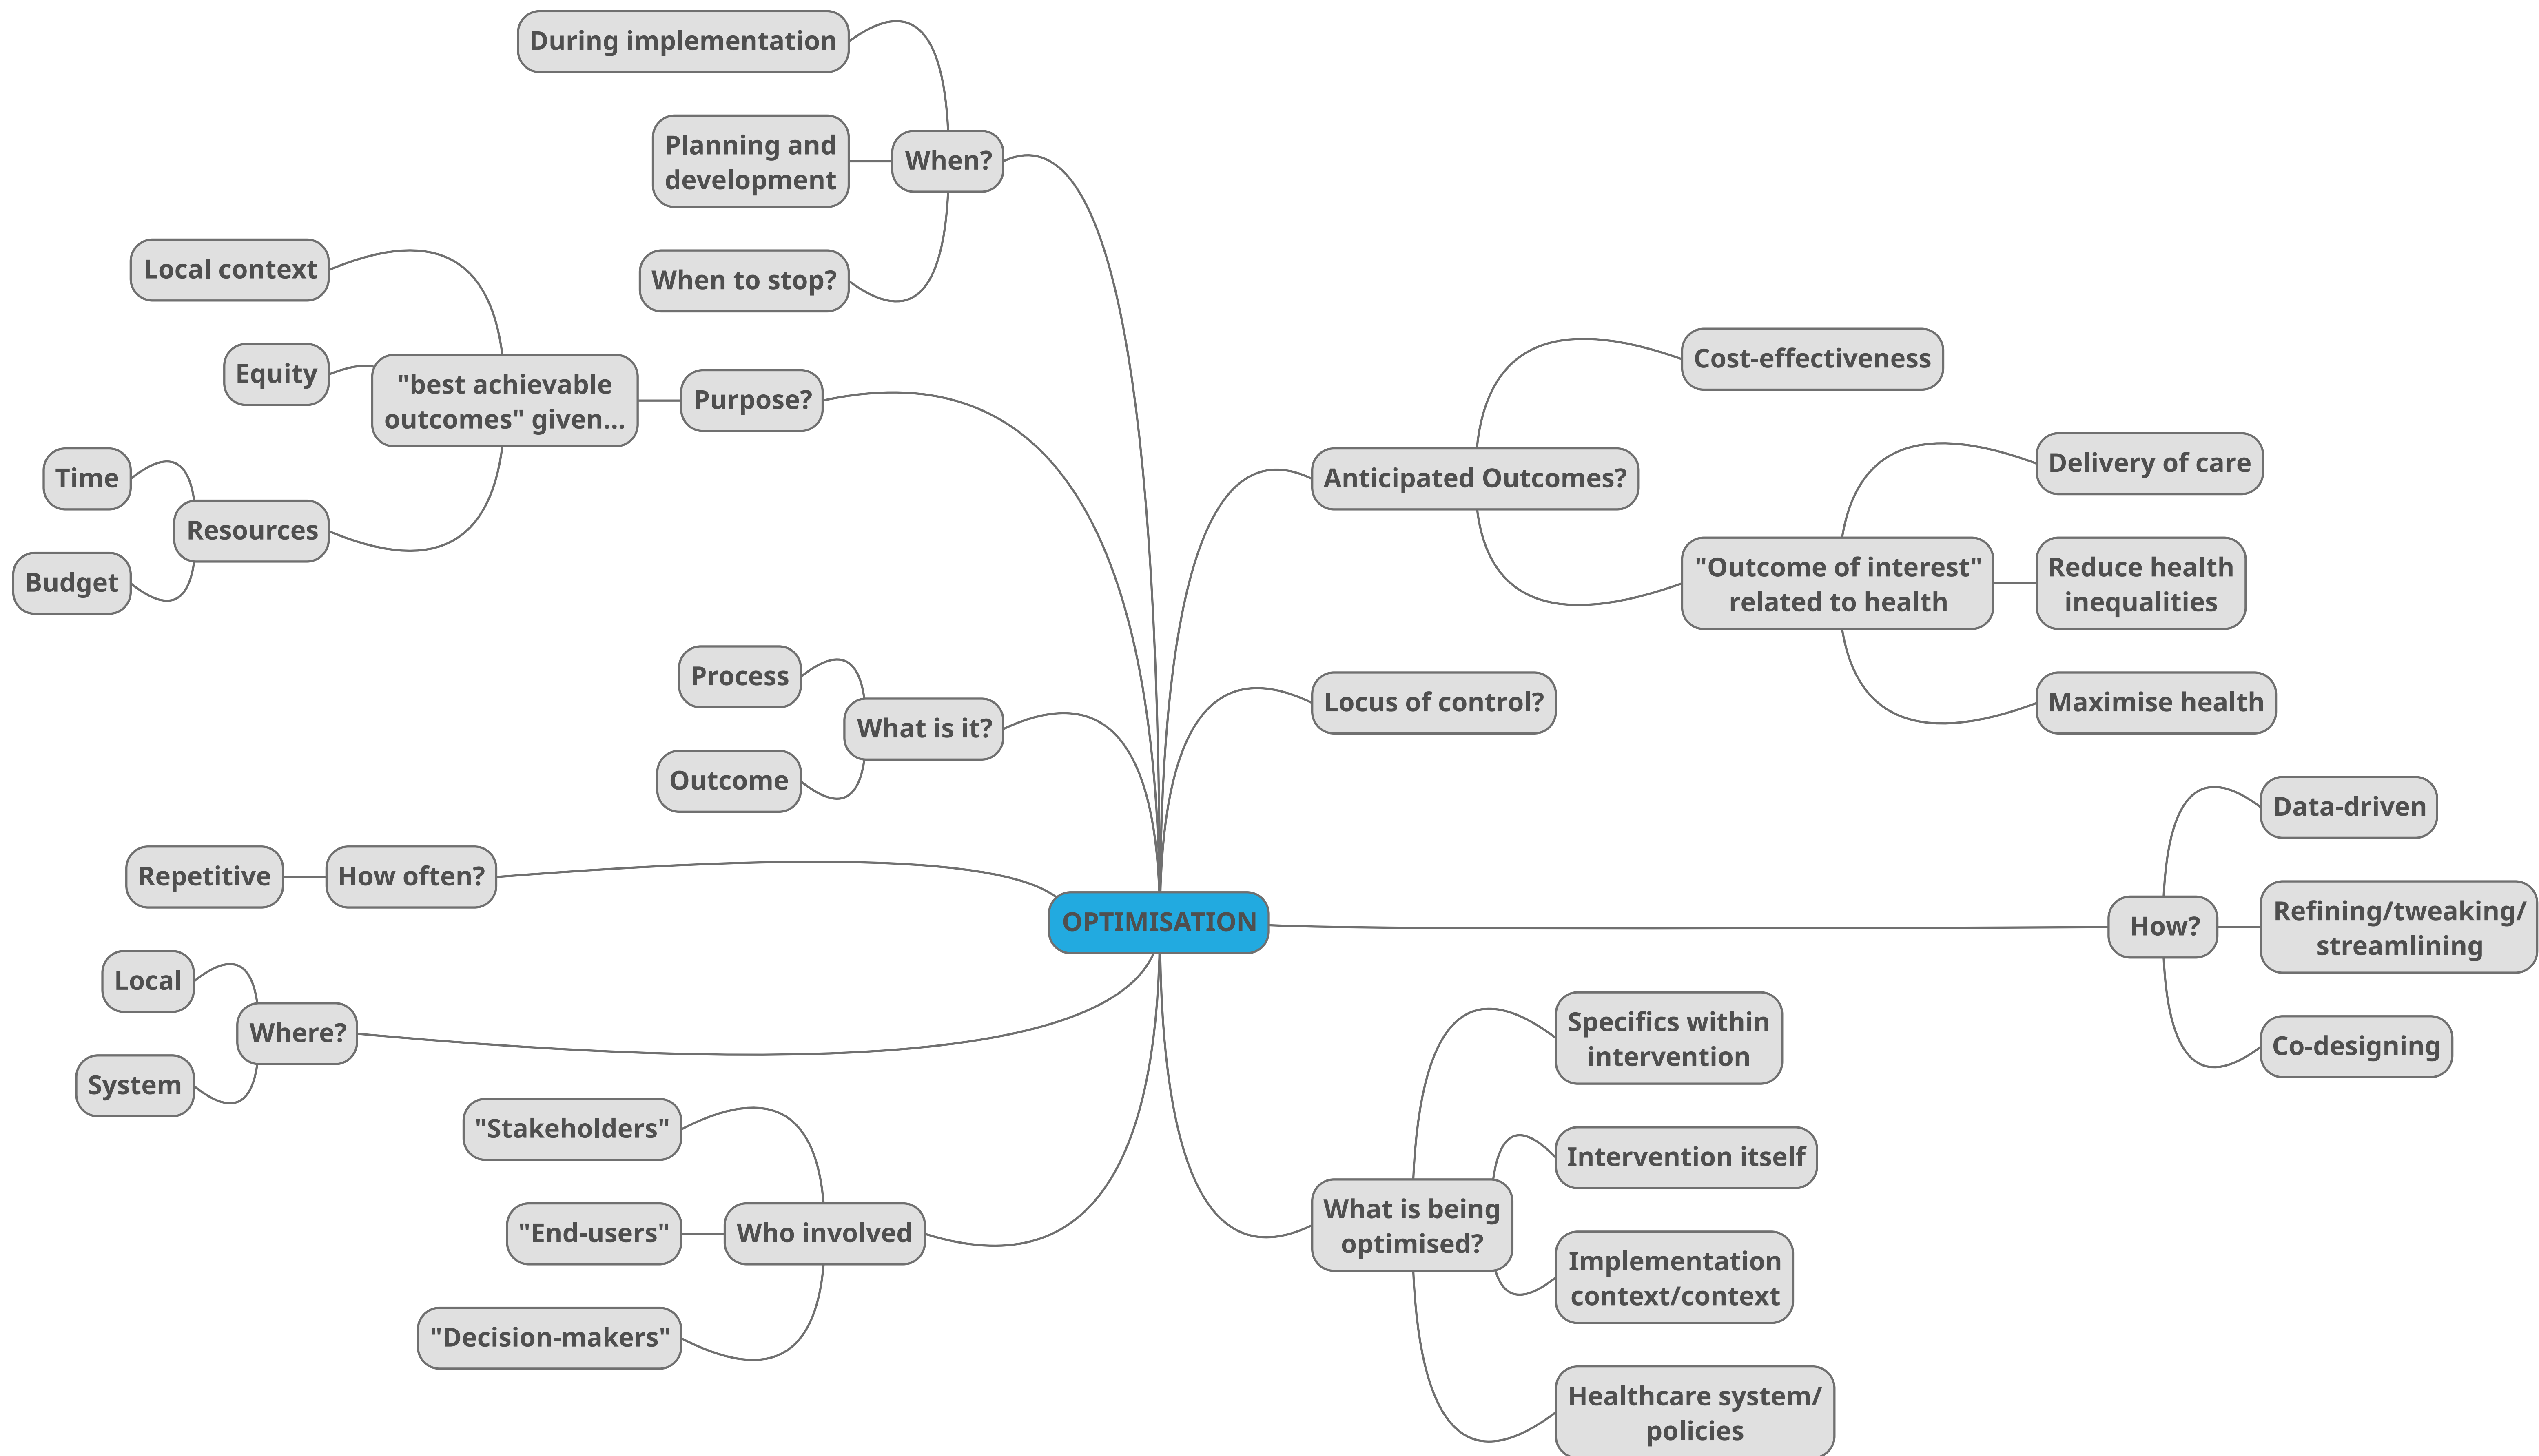

Supplement: MOESM3 [file 17680328]
